# Supplementary material for: Improvement of the piezoelectric properties of PVDF-HFP using AgNWs
Source: Royal Society of Chemistry journal article supplement (doi:10.1039/c4ra03382e), 2014-01-01
Supplement: c4ra03382e1.pdf [file c4ra03382e1.pdf]

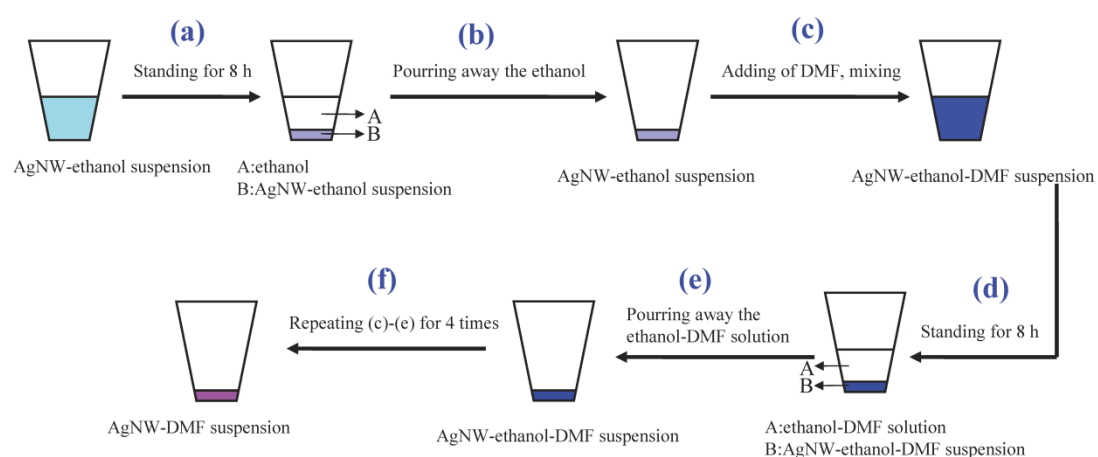

### ESI-1 Replacement of ethanol by DMF

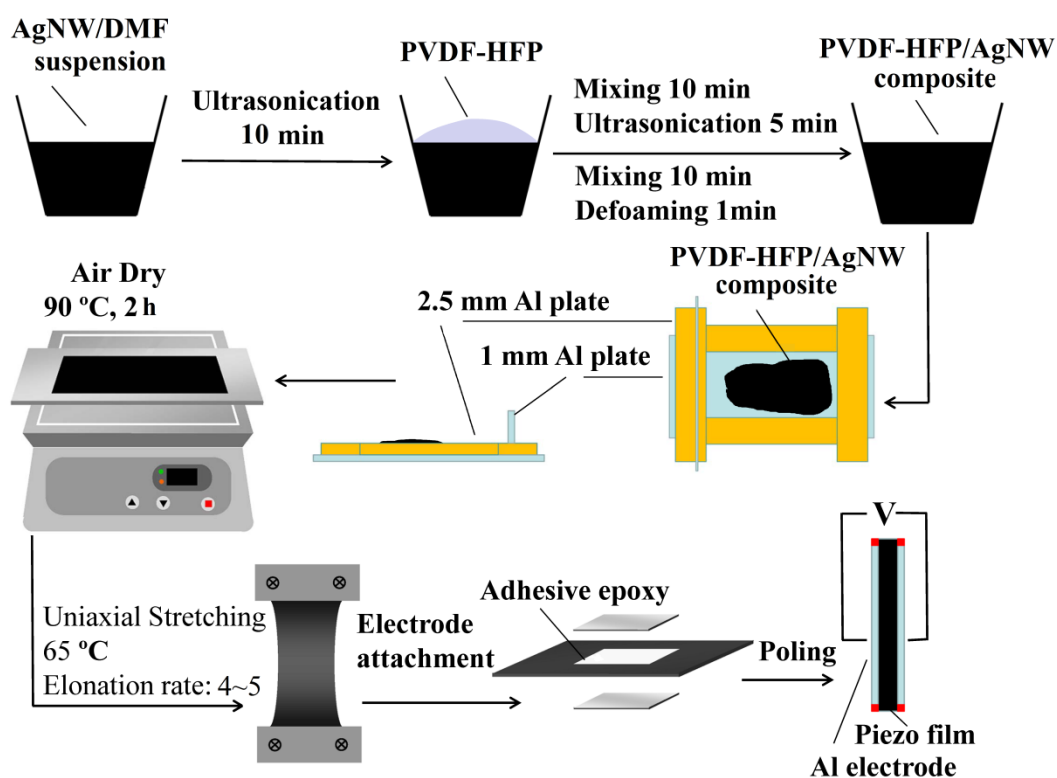

### ESI-2 Preparation of PVDF-HFP/AgNW composite films

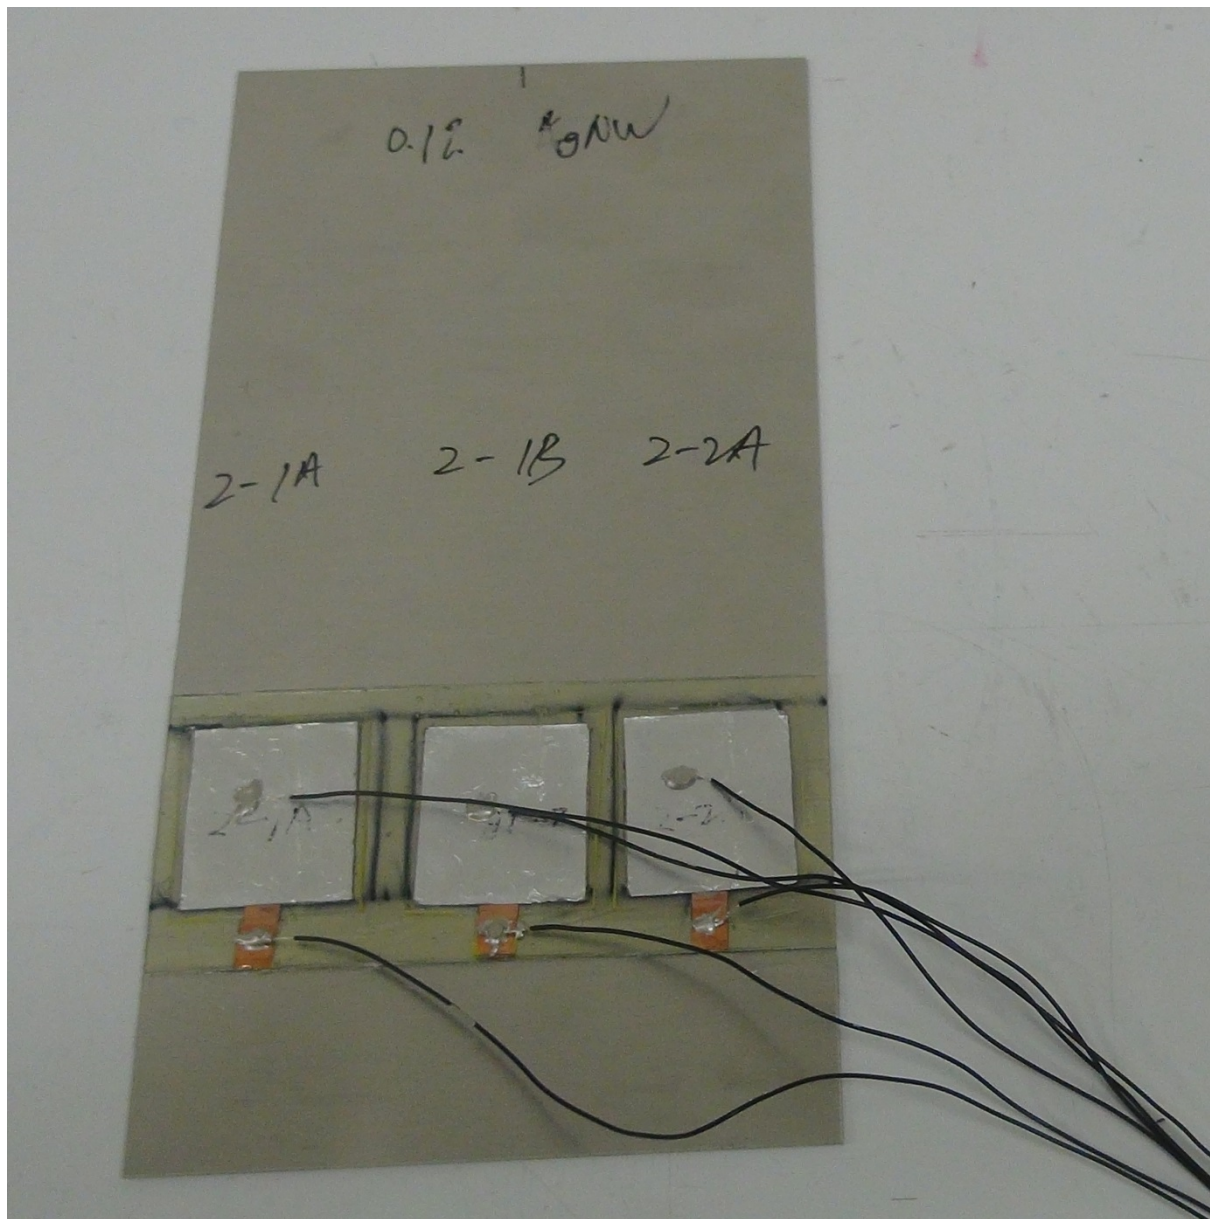

**ESI-3** Attachment of piezofilms on Al plate

## Coordinate systems of PVDF-HFP films

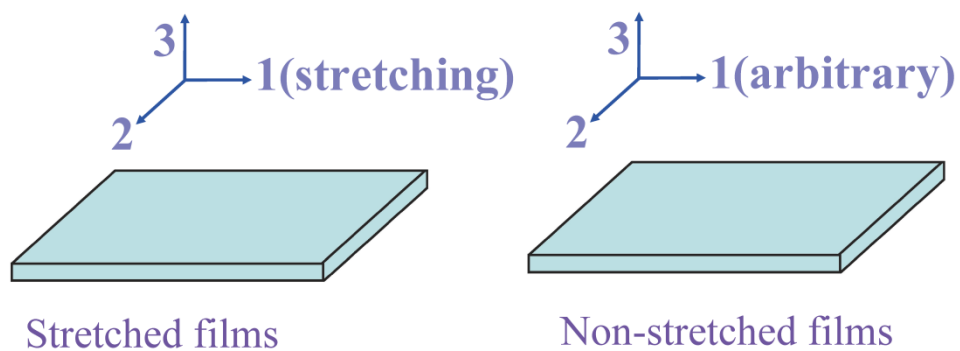

**ESI-4** Coordinate systems of PVDF-HFP films
